# Supplementary material for: Plastome structure, phylogeny and evolution of plastid genes in Reevesia (Helicteroideae, Malvaceae)
Source: Research Square preprint supplement (doi:10.21203/rs.3.rs-3774053/v1), 2023-12-28
Supplement: Supplementary file 1 [file 3c6ee8ce1e56a9e3bf52b0df.xlsx]

## Sheet: Sheet
Table S2. List of genes in the plastomes of 11 Reevesia plastomes
Category for genes	Gene groups	Name of genes
Self-replication	Large ribosmal subunits	rpl2*, rpl14, rpl16*, rpl20, rpl22,
		rpl23, rpl32, rpl33, rpl36
	Small ribosmal subunits	rps2, rps3, rps4, rps7, rps8, rps11,
		rps12*, rps14, rps15, rps16*, rps18, rps19
	DNA-dependent RNA polymerase	rpoA, rpoB, rpoC1*, rpoC2
	Protease	clpP**
	Maturase	matK
	Ribosomal RNAs	rrn4.5, rrn5, rrn16, rrn23
	Transfer RNAs	trnA-UGC*, trnC-GCA, trnD-GUC, trnE-UUC, trnF-GAA, trnfM-CAU, trnG-GCC*, trnG-UCC, trnH-GUG, trnI-CAU, trnI-GAU*, trnK-UUU*, trnL-CAA, trnL-UAA*, trnL-UAG, trnM-CAU, trnN-GUU, trnP-UGG, trnQ-UUG, trnR-ACG, trnR-UCU, trnS-GCU, trnS-GGA, trnS-UGA, trnT-GGU, trnT-UGU, trnV-GAC, trnV-UAC*, trnW-CCA, trnY-GUA
Phytosynthesis	Photosystem I	psaA, psaB, psaC, psaI, psaJ
	Photosystem II	psbA, psbB, psbC, psbD, psbE, psbF, psbH,
		psbI, psbJ, psbK, psbL, psbM, psbN, psbT, psbZ
	NaD(P)H dehydrogenase complex	ndhA*, ndhB*, ndhC, ndhD, ndhE,
		ndhF, ndhG, ndhH, ndhI, ndhJ, ndhK
	F-type ATP synthase	atpA, atpB, atpE, atpF*, atpH, atpI
	Cytochrome b6/f complex	petA, petB*, petD*, petG, petL, petN
Other genes	inner memebranne protein	cemA
	Cytochrome c biogensis protein	ccsA
	Large subunit of Rubisco	rbcL
	Subunit of acetyl-CoA-carboxylase	accD
	Translation initiation factor	infA
	Function uncertain	ycf1, ycf2, ycf3**, ycf4, ycf15
*gene containing one intron, **gene containing two introns, Genes in bold are located within the inverted repeat (IR).
