# Supplementary material for: Plastome structure, phylogeny and evolution of plastid genes in Reevesia (Helicteroideae, Malvaceae)
Source: Research Square preprint supplement (doi:10.21203/rs.3.rs-3774053/v1), 2023-12-28
Supplement: Supplementary file 2 [file 52cce656bb32929f375bc3ac.xlsx]

## Sheet: dN|dS ratio
Table S6. Results of selective pressure analysis
Gene	Omega (dN/dS)
accD	0.829
atpA	0
atpB	0
atpE	0
atpF	0
atpH	0
atpI	0
ccsA	0
cemA	0
clpP	0.119
infA	0
matK	0.509
ndhA	0
ndhB	0.453
ndhC	0
ndhD	0.968
ndhE	0
ndhF	0.269
ndhG	0
ndhH	0.211
ndhI	0
ndhJ	0
ndhK	0.086
petA	0.164
petB	0
petD	0.882
petG	0
petL	0
petN	0
psaA	0.041
psaB	0.194
psaC	0
psaI	0
psaJ	0
psbA	0
psbB	0
psbC	0
psbD	0
psbE	0
psbF	0
psbH	0
psbI	0
psbJ	0
psbK	0
psbL	0
psbM	0
psbN	0
psbT	0
psbZ	0.125
rbcL	0.497
rpl2	0
rpl14	0
rpl16	0
rpl20	0.574
rpl22	0
rpl23	0
rpl32	0
rpl33	0.401
rpl36	0
rpoA	0.721
rpoB	0.457
rpoC1	0.1
rpoC2	0.43
rps2	0.242
rps3	0
rps4	0
rps7	0
rps8	0
rps11	0
rps12	0
rps14	0
rps15	0.229
rps16	0
rps18	0
rps19	0.209
ycf1	0.377
ycf2	0
ycf3	0
ycf4	0.658
ycf15	0
dN/dS ratio > 1 indicates strong positive selection

## Sheet: LRT of site model
Results of LRT with the site-specific model.
Gene	Omega (dN/dS)	Model	lnL	Comparisons	2ΔL	P-value	Selected sites (BEB, PP>95%)
accD	0.829	Model0	-1934.84	M0 vs M3	0	1	none
		Model3	-1934.84
		Model1	-1934.84	M1 vs M2	0	1
		Model2	-1934.84
		Model7	-1934.84	M7 vs M8	0.00834	0.995839
		Model8	-1934.84
matK	0.509	Model0	-2053.15	M0 vs M3	4.56144	0.335324	none
		Model3	-2050.87
		Model1	-2052.34	M1 vs M2	2.94168	0.229733
		Model2	-2050.87
		Model7	-2052.38	M7 vs M8	3.03199	0.219589
		Model8	-2050.87
ndhD	0.968	Model0	-2002.05	M0 vs M3	0	1	none
		Model3	-2002.05
		Model1	-2002.05	M1 vs M2	2e-06	0.999999
		Model2	-2002.05
		Model7	-2002.05	M7 vs M8	0.000442	0.999779
		Model8	-2002.05
petD	0.882	Model0	-649.476	M0 vs M3	0	1	none
		Model3	-649.476
		Model1	-649.476	M1 vs M2	6e-06	0.999997
		Model2	-649.476
		Model7	-649.476	M7 vs M8	2e-06	0.999999
		Model8	-649.476
rpl20	0.574	Model0	-482.44	M0 vs M3	0	1	none
		Model3	-482.44
		Model1	-482.44	M1 vs M2	0.000174	0.999913
		Model2	-482.44
		Model7	-482.447	M7 vs M8	0.01445	0.992801
		Model8	-482.44
rpoA	0.721	Model0	-1308.96	M0 vs M3	0.00011	1	none
		Model3	-1308.96
		Model1	-1308.96	M1 vs M2	0	1
		Model2	-1308.96
		Model7	-1308.96	M7 vs M8	0.000194	0.999903
		Model8	-1308.96
ycf4	0.658	Model0	-756.868	M0 vs M3	0	1	none
		Model3	-756.868
		Model1	-756.868	M1 vs M2	0	1
		Model2	-756.868
		Model7	-756.868	M7 vs M8	0	1
		Model8	-756.868
P-value < 0.05 indicated significant.

## Sheet: LRT of branch model
Results of LRT with the branch-specific model.
Gene	Model	lnL	Comparisons	2ΔL	P-value	Selected branch (dN/dS > 1)
accD	one ratio model (m0)	-1934.84	m0 vs. m1	5.75135	0.99999
	free ration model (m1)	-1931.96
	one ratio model (m0)	-1934.84	m0 vs. m2	0.333908	0.846239
	two ration model (m2)	-1934.67
matK	one ratio model (m0)	-2053.15	m0 vs. m1	7.09176	0.999914
	free ration model (m1)	-2049.6
	one ratio model (m0)	-2053.15	m0 vs. m2	0.85692	0.651512
	two ration model (m2)	-2052.72
ndhD	one ratio model (m0)	-2002.05	m0 vs. m1	2.24689	1
	free ration model (m1)	-2000.93
	one ratio model (m0)	-2002.05	m0 vs. m2	0.002684	0.998659
	two ration model (m2)	-2002.05
petD	one ratio model (m0)	-649.476	m0 vs. m1	4.50786	0.999999
	free ration model (m1)	-647.222
	one ratio model (m0)	-649.476	m0 vs. m2	4.5078	0.104989
	two ration model (m2)	-647.222
rpl20	one ratio model (m0)	-482.44	m0 vs. m1	0.678444	1
	free ration model (m1)	-482.1
	one ratio model (m0)	-482.44	m0 vs. m2	0.000124	0.999938
	two ration model (m2)	-482.44
rpoA	one ratio model (m0)	-1308.96	m0 vs. m1	1.72696	1
	free ration model (m1)	-1308.1
	one ratio model (m0)	-1308.96	m0 vs. m2	0.679368	0.711995
	two ration model (m2)	-1308.62
ycf4	one ratio model (m0)	-756.868	m0 vs. m1	0.681798	1
	free ration model (m1)	-756.527
	one ratio model (m0)	-756.868	m0 vs. m2	0.000694	0.999653
	two ration model (m2)	-756.868
P-value < 0.05 indicated significant. # value indicates the dN/dS ratio of each branch.
