# Supplementary material for: Plastome structure, phylogeny and evolution of plastid genes in Reevesia (Helicteroideae, Malvaceae)
Source: Research Square preprint supplement (doi:10.21203/rs.3.rs-3774053/v1), 2023-12-28
Supplement: Supplementary file 3 [file 5819914c8df04ce1362e1259.xlsx]

## Sheet: sheet
Table S1. General information of 11 newly sequenced Reevesia plastomes
Taxa	Total		LSC		SSC		IR		Coding regions size (%)	CDS regions size (%)	RNA regions size (%)	Noncoding regions size (%)	Number of unique genes	Number of unique CDS	Number of total CDS	Number of total tRNA	Number of total rRNA	Number of total genes
	length (bp)	GC (%)	Length (bp)	GC (%)	Length (bp)	GC (%)	Length (bp)	GC (%)
Reevesia botingensis (1)	161532	36.9	90225	34.7	20317	31.4	25495	42.9	56.3	49	7.3	43.7	114	80	87	37	8	132
Reevesia glaucophylla	161945	36.8	90665	34.6	20308	31.5	25486	42.9	56.18	48.9	7.3	43.82	114	80	87	37	8	132
Reevesia lofouensis	161894	36.8	90624	34.6	20314	31.5	25478	42.9	56.2	48.9	7.3	43.8	114	80	87	37	8	132
Reevesia longipetiolata	161826	36.8	90605	34.6	20291	31.5	25465	43	56.23	48.9	7.3	43.77	114	80	87	37	8	132
Reevesia membranacea (1)	161852	36.8	90572	34.6	20308	31.5	25486	42.9	56.22	48.9	7.3	43.78	114	80	87	37	8	132
Reevesia membranacea (2)	161853	36.8	90573	34.6	20308	31.5	25486	42.9	56.22	48.9	7.3	43.78	114	80	87	37	8	132
Reevesia orbicularifolia	161764	36.8	90518	34.6	20308	31.5	25469	42.9	56.25	48.9	7.3	43.75	114	80	87	37	8	132
Reevesia pubescens	161784	36.8	90534	34.6	20298	31.5	25476	42.9	56.25	48.9	7.3	43.75	114	80	87	37	8	132
Reevesia thyrsoidea (1)	161832	36.8	90611	34.6	20289	31.5	25466	43	56.22	48.9	7.3	43.78	114	80	87	37	8	132
Reevesia tomentosa	161830	36.8	90608	34.6	20290	31.5	25466	43	56.22	48.9	7.3	43.78	114	80	87	37	8	132
Reevesiaxue fengensis	161859	36.8	90576	34.6	20309	31.5	25487	42.9	56.21	48.9	7.3	43.79	114	80	87	37	8	132
