# Supplementary material for: Plastome structure, phylogeny and evolution of plastid genes in Reevesia (Helicteroideae, Malvaceae)
Source: Research Square preprint supplement (doi:10.21203/rs.3.rs-3774053/v1), 2023-12-28
Supplement: Supplementary file 4 [file c489dcccb67fb4bde74b7711.xlsx]

## Sheet: sheet
Table S3. Codon usage and relative synonymous codon usage (RSCU) values of protain-coding genes of the 15 Reevesia species
Amino acid	Species	Reevesia botingensis (1)		Reevesia botingensis (2)		Reevesia glaucophylla		Reevesia lofouensis		Reevesia longipetiolata		Reevesia membranacea (1)		Reevesia membranacea (2)		Reevesia orbicularifolia		Reevesia pubescens		Reevesia pycnantha		Reevesia rotundifolia		Reevesia thyrsoidea (1)		Reevesia thyrsoidea (2)		Reevesia tomentosa		Reevesia xuefengensis
	Codon	Count	RSCU	Count	RSCU	Count	RSCU	Count	RSCU	Count	RSCU	Count	RSCU	Count	RSCU	Count	RSCU	Count	RSCU	Count	RSCU	Count	RSCU	Count	RSCU	Count	RSCU	Count	RSCU	Count	RSCU
Phe	UUU(F)	962	1.28	885	1.3	960	1.29	961	1.29	961	1.28	961	1.29	961	1.29	961	1.29	960	1.29	961	1.29	961	1.29	961	1.28	961	1.28	961	1.28	961	1.29
	UUC(F)	536	0.72	474	0.7	533	0.71	534	0.71	540	0.72	534	0.71	534	0.71	533	0.71	533	0.71	534	0.71	532	0.71	540	0.72	540	0.72	541	0.72	534	0.71
Leu	UUA(L)	860	1.86	825	1.92	858	1.85	858	1.85	853	1.85	858	1.85	858	1.85	861	1.86	863	1.86	858	1.85	859	1.85	853	1.85	853	1.85	852	1.84	858	1.85
	UUG(L)	569	1.23	522	1.22	577	1.24	577	1.24	574	1.24	577	1.24	577	1.24	574	1.24	575	1.24	577	1.24	576	1.24	574	1.24	574	1.24	574	1.24	577	1.24
	CUU(L)	577	1.25	530	1.23	579	1.25	579	1.25	580	1.25	579	1.25	579	1.25	579	1.25	578	1.25	579	1.25	579	1.25	580	1.25	580	1.25	580	1.26	579	1.25
	CUC(L)	191	0.41	173	0.4	193	0.42	193	0.42	192	0.42	193	0.42	193	0.42	193	0.42	193	0.42	193	0.42	194	0.42	192	0.42	192	0.42	192	0.42	193	0.42
	CUA(L)	382	0.83	357	0.83	385	0.83	385	0.83	383	0.83	385	0.83	385	0.83	385	0.83	383	0.83	385	0.83	387	0.83	383	0.83	383	0.83	383	0.83	385	0.83
	CUG(L)	190	0.41	170	0.4	190	0.41	190	0.41	191	0.41	190	0.41	190	0.41	189	0.41	192	0.41	190	0.41	190	0.41	191	0.41	191	0.41	191	0.41	190	0.41
Ile	AUU(I)	1114	1.48	1026	1.47	1116	1.48	1116	1.48	1113	1.48	1116	1.48	1116	1.48	1115	1.48	1114	1.48	1114	1.48	1112	1.48	1113	1.48	1113	1.48	1113	1.48	1115	1.48
	AUC(I)	444	0.59	406	0.58	446	0.59	446	0.59	445	0.59	446	0.59	446	0.59	446	0.59	447	0.59	446	0.59	446	0.59	445	0.59	445	0.59	445	0.59	447	0.59
	AUA(I)	702	0.93	656	0.94	697	0.93	699	0.93	701	0.93	699	0.93	699	0.93	702	0.93	702	0.93	699	0.93	697	0.93	701	0.93	701	0.93	701	0.93	700	0.93
Met	AUG(M)	613	1	577	1	616	1	615	1	614	1	615	1	615	1	615	1	614	1	615	1	615	1	614	1	614	1	614	1	615	1
Val	GUU(V)	503	1.44	479	1.46	501	1.44	501	1.44	502	1.44	501	1.44	501	1.44	501	1.44	502	1.44	502	1.44	503	1.44	502	1.44	502	1.44	502	1.44	501	1.44
	GUC(V)	174	0.5	162	0.49	175	0.5	175	0.5	174	0.5	175	0.5	175	0.5	175	0.5	174	0.5	175	0.5	174	0.5	174	0.5	174	0.5	174	0.5	175	0.5
	GUA(V)	516	1.48	485	1.47	516	1.48	516	1.48	519	1.49	516	1.48	516	1.48	516	1.48	516	1.48	516	1.48	515	1.48	518	1.49	518	1.49	518	1.49	516	1.48
	GUG(V)	200	0.57	190	0.58	200	0.57	200	0.57	199	0.57	200	0.57	200	0.57	200	0.57	200	0.57	200	0.57	201	0.58	200	0.57	200	0.57	200	0.57	200	0.57
Ser	UCU(S)	575	1.69	526	1.72	570	1.68	570	1.68	570	1.68	570	1.68	570	1.68	570	1.68	570	1.68	569	1.67	570	1.68	570	1.68	570	1.68	570	1.68	570	1.68
	UCC(S)	323	0.95	281	0.92	322	0.95	322	0.95	322	0.95	322	0.95	322	0.95	321	0.94	321	0.95	322	0.95	321	0.94	322	0.95	322	0.95	322	0.95	322	0.95
	UCA(S)	420	1.24	367	1.2	422	1.24	422	1.24	422	1.24	422	1.24	422	1.24	424	1.25	421	1.24	422	1.24	424	1.25	423	1.24	423	1.24	422	1.24	422	1.24
	UCG(S)	188	0.55	163	0.53	187	0.55	187	0.55	188	0.55	187	0.55	187	0.55	187	0.55	187	0.55	187	0.55	187	0.55	187	0.55	187	0.55	188	0.55	187	0.55
	AGU(S)	407	1.2	382	1.25	410	1.21	410	1.21	411	1.21	410	1.21	410	1.21	410	1.21	410	1.21	410	1.21	409	1.2	411	1.21	411	1.21	411	1.21	410	1.21
	AGC(S)	126	0.37	115	0.38	129	0.38	128	0.38	127	0.37	128	0.38	128	0.38	128	0.38	128	0.38	129	0.38	128	0.38	127	0.37	127	0.37	127	0.37	128	0.38
Pro	CCU(P)	424	1.56	400	1.56	426	1.56	425	1.56	425	1.56	424	1.56	424	1.56	423	1.55	423	1.55	424	1.56	423	1.55	425	1.56	425	1.56	425	1.56	425	1.56
	CCC(P)	203	0.75	196	0.76	204	0.75	204	0.75	203	0.74	205	0.75	205	0.75	205	0.75	205	0.75	205	0.75	205	0.75	203	0.74	203	0.74	203	0.74	204	0.75
	CCA(P)	309	1.13	291	1.14	309	1.13	309	1.13	309	1.13	309	1.13	309	1.13	310	1.14	310	1.14	310	1.14	310	1.14	309	1.13	309	1.13	309	1.13	309	1.13
	CCG(P)	153	0.56	138	0.54	152	0.56	152	0.56	154	0.56	152	0.56	152	0.56	152	0.56	153	0.56	151	0.55	152	0.56	154	0.56	154	0.56	154	0.56	152	0.56
Thr	ACU(T)	521	1.57	499	1.58	521	1.57	521	1.57	523	1.57	521	1.57	521	1.57	521	1.57	520	1.57	521	1.57	521	1.57	523	1.57	523	1.57	523	1.57	521	1.57
	ACC(T)	254	0.76	243	0.77	251	0.76	251	0.76	252	0.76	251	0.76	251	0.76	253	0.76	252	0.76	251	0.76	252	0.76	252	0.76	252	0.76	252	0.76	251	0.76
	ACA(T)	408	1.23	391	1.24	408	1.23	408	1.23	410	1.23	408	1.23	408	1.23	408	1.23	409	1.23	408	1.23	406	1.23	410	1.23	410	1.23	410	1.23	408	1.23
	ACG(T)	146	0.44	130	0.41	148	0.45	148	0.45	145	0.44	148	0.45	148	0.45	147	0.44	147	0.44	148	0.45	146	0.44	145	0.44	145	0.44	145	0.44	148	0.45
Ala	GCU(A)	636	1.8	619	1.79	638	1.8	638	1.8	639	1.81	638	1.8	638	1.8	638	1.8	639	1.8	639	1.8	638	1.8	639	1.81	639	1.81	639	1.81	638	1.8
	GCC(A)	240	0.68	238	0.69	237	0.67	237	0.67	236	0.67	237	0.67	237	0.67	237	0.67	236	0.67	237	0.67	236	0.67	236	0.67	236	0.67	236	0.67	237	0.67
	GCA(A)	375	1.06	366	1.06	373	1.05	373	1.05	374	1.06	373	1.05	373	1.05	375	1.06	377	1.06	373	1.05	377	1.06	374	1.06	374	1.06	374	1.06	373	1.05
	GCG(A)	165	0.47	161	0.47	168	0.47	168	0.47	166	0.47	168	0.47	168	0.47	166	0.47	167	0.47	168	0.47	166	0.47	166	0.47	166	0.47	166	0.47	168	0.47
Tyr	UAU(Y)	788	1.6	728	1.59	791	1.6	793	1.61	793	1.61	791	1.6	791	1.6	791	1.6	792	1.6	793	1.61	789	1.6	792	1.6	792	1.6	792	1.6	791	1.6
	UAC(Y)	196	0.4	187	0.41	196	0.4	194	0.39	195	0.39	196	0.4	196	0.4	195	0.4	195	0.4	195	0.39	196	0.4	195	0.4	195	0.4	195	0.4	196	0.4
TER	UAA(*)	50	1.72	49	1.69	49	1.69	49	1.69	49	1.69	49	1.69	49	1.69	49	1.69	49	1.69	49	1.69	49	1.69	49	1.69	49	1.69	49	1.69	49	1.69
	UAG(*)	20	0.69	20	0.69	20	0.69	20	0.69	20	0.69	20	0.69	20	0.69	20	0.69	20	0.69	20	0.69	20	0.69	20	0.69	20	0.69	20	0.69	20	0.69
	UGA(*)	17	0.59	18	0.62	18	0.62	18	0.62	18	0.62	18	0.62	18	1.49	18	0.62	18	0.62	18	0.62	18	0.62	18	0.62	18	0.62	18	0.62	18	0.62
His	CAU(H)	474	1.48	436	1.5	477	1.49	477	1.49	476	1.49	476	1.49	476	0.51	477	1.49	477	1.49	477	1.49	477	1.49	477	1.49	477	1.49	477	1.49	476	1.49
	CAC(H)	165	0.52	146	0.5	163	0.51	163	0.51	164	0.51	163	0.51	163	1.55	163	0.51	164	0.51	163	0.51	163	0.51	164	0.51	164	0.51	164	0.51	163	0.51
Gln	CAA(Q)	728	1.56	650	1.53	727	1.55	727	1.55	728	1.55	727	1.55	727	0.45	727	1.55	728	1.55	726	1.55	728	1.55	729	1.55	729	1.55	729	1.55	727	1.55
	CAG(Q)	207	0.44	198	0.47	210	0.45	210	0.45	210	0.45	211	0.45	211	1.53	210	0.45	209	0.45	210	0.45	210	0.45	210	0.45	210	0.45	210	0.45	211	0.45
Asn	AAU(N)	984	1.54	862	1.54	988	1.53	988	1.53	988	1.54	988	1.53	988	0.47	988	1.54	990	1.54	988	1.54	990	1.54	988	1.54	988	1.54	988	1.54	988	1.53
	AAC(N)	296	0.46	261	0.46	300	0.47	300	0.47	297	0.46	300	0.47	300	1.49	298	0.46	299	0.46	299	0.46	299	0.46	297	0.46	297	0.46	297	0.46	300	0.47
Lys	AAA(K)	1045	1.49	933	1.5	1043	1.49	1042	1.49	1039	1.49	1042	1.49	1042	0.51	1042	1.49	1041	1.49	1042	1.49	1043	1.49	1038	1.48	1038	1.48	1038	1.48	1042	1.49
	AAG(K)	362	0.51	312	0.5	357	0.51	358	0.51	360	0.51	358	0.51	358	1.59	360	0.51	360	0.51	358	0.51	358	0.51	360	0.52	360	0.52	360	0.52	358	0.51
Asp	GAU(D)	873	1.6	772	1.59	876	1.59	876	1.59	877	1.6	876	1.59	876	0.41	876	1.59	877	1.6	876	1.59	877	1.59	877	1.6	877	1.6	877	1.6	876	1.59
	GAC(D)	221	0.4	202	0.41	223	0.41	223	0.41	222	0.4	223	0.41	223	1.48	223	0.41	222	0.4	223	0.41	223	0.41	222	0.4	222	0.4	222	0.4	223	0.41
Glu	GAA(E)	1020	1.48	924	1.5	1020	1.48	1020	1.48	1023	1.49	1020	1.48	1020	0.52	1020	1.48	1020	1.48	1020	1.48	1020	1.48	1023	1.49	1023	1.49	1023	1.49	1020	1.48
	GAG(E)	354	0.52	310	0.5	354	0.52	354	0.52	354	0.51	354	0.52	354	1.49	354	0.52	354	0.52	354	0.52	354	0.52	354	0.51	354	0.51	354	0.51	354	0.52
Cys	UGU(C)	229	1.5	212	1.48	227	1.49	227	1.49	226	1.49	227	1.49	227	0.51	227	1.5	226	1.49	227	1.49	227	1.49	226	1.49	226	1.49	226	1.49	227	1.49
	UGC(C)	76	0.5	74	0.52	77	0.51	77	0.51	77	0.51	77	0.51	77	0.62	76	0.5	77	0.51	77	0.51	77	0.51	77	0.51	77	0.51	77	0.51	77	0.51
Trp	UGG(W)	455	1	408	1	455	1	455	1	456	1	455	1	455	1	455	1	456	1	455	1	455	1	456	1	456	1	456	1	455	1
Arg	CGU(R)	337	1.28	317	1.32	340	1.29	340	1.29	340	1.29	340	1.29	340	1.29	340	1.29	340	1.29	340	1.29	339	1.29	340	1.29	340	1.29	340	1.29	340	1.29
	CGC(R)	114	0.43	105	0.44	113	0.43	113	0.43	113	0.43	113	0.43	113	0.43	113	0.43	114	0.43	113	0.43	113	0.43	113	0.43	113	0.43	113	0.43	113	0.43
	CGA(R)	364	1.38	345	1.44	364	1.38	364	1.38	364	1.38	364	1.38	364	1.38	363	1.38	364	1.38	364	1.38	364	1.38	364	1.38	364	1.38	364	1.38	364	1.38
	CGG(R)	117	0.44	104	0.43	114	0.43	114	0.43	113	0.43	114	0.43	114	0.43	114	0.43	113	0.43	114	0.43	114	0.43	113	0.43	113	0.43	113	0.43	114	0.43
	AGA(R)	476	1.81	424	1.77	477	1.81	475	1.8	478	1.81	475	1.8	475	1.8	476	1.81	475	1.8	476	1.81	474	1.8	478	1.81	478	1.81	478	1.81	474	1.8
	AGG(R)	174	0.66	145	0.6	173	0.66	173	0.66	173	0.66	173	0.66	173	0.66	172	0.65	173	0.66	173	0.66	173	0.66	173	0.66	173	0.66	173	0.66	173	0.66
Gly	GGU(G)	588	1.29	573	1.32	583	1.29	583	1.29	583	1.29	583	1.29	583	1.29	583	1.28	583	1.29	583	1.29	582	1.28	583	1.29	583	1.29	583	1.29	583	1.29
	GGC(G)	184	0.41	177	0.41	183	0.4	184	0.41	185	0.41	184	0.41	184	0.41	185	0.41	185	0.41	185	0.41	184	0.41	185	0.41	185	0.41	185	0.41	184	0.41
	GGA(G)	730	1.61	687	1.58	731	1.61	730	1.61	726	1.6	730	1.61	730	1.61	730	1.61	728	1.61	730	1.61	731	1.61	726	1.6	726	1.6	726	1.6	730	1.61
	GGG(G)	315	0.69	300	0.69	316	0.7	317	0.7	318	0.7	317	0.7	317	0.7	317	0.7	318	0.7	316	0.7	316	0.7	318	0.7	318	0.7	318	0.7	317	0.7
	Total	26365		24302		26382		26382		26382		26382		26382		26382		26388		26382		26375		26382		26382		26382		26382
