# Supplementary material for: Plastome structure, phylogeny and evolution of plastid genes in Reevesia (Helicteroideae, Malvaceae)
Source: Research Square preprint supplement (doi:10.21203/rs.3.rs-3774053/v1), 2023-12-28
Supplement: Supplementary file 5 [file d15a5762859f994d7e802fed.xlsx]

## Sheet: sheet
Table S5. Information of the nucleotide diversity (Pi) of the 15 Reevesia plastomes
Coding region	Pi value	Noncoding region	Pi value
psbA	0.00047	start-trnH-GUG	0
matK	0.00191	trnH-GUG-psbA	0.00962
rps16	0.00335	psbA-trnK-UUU	0.00292
psbK	0	trnK-UUU-matK	0.00179
psbI	0.00223	trnK-UUU intron	0.00292
atpA	0.00111	matK-trnK-UUU	0.00544
atpF	0.00045	trnK-UUU-rps16	0.00372
atpH	0	rps16 intron	0.00463
atpI	0.00051	rps16-trnQ-UUG	0.00418
rps2	0.00131	trnQ-UUG-psbK	0.00157
rpoC2	0.00191	psbK-psbI	0.00448
rpoC1	0.00132	psbI-trnS-GCU	0.00566
rpoB	0.00151	trnS-GCU-trnG-GCC	0.00482
petN	0.00275	trnG-GCC intron	0.00438
psbM	0	trnG-GCC-trnR-UCU	0.00755
psbD	0.00097	trnR-UCU-atpA	0.0068
psbC	0.00071	atpA-atpF	0
psbZ	0.00333	atpF intron	0.00096
rps14	0.00088	atpF-atpH	0.00685
psaB	0.00046	atpH-atpI	0.00304
psaA	0.00107	atpI-rps2	0.00115
ycf3	0.00049	rps2-rpoC2	0.01488
rps4	0.00022	rpoC2-rpoC1	0
ndhJ	0	rpoC1 intron	0.00185
ndhK	0.00185	rpoC1-rpoB	0
ndhC	0.00142	rpoB-trnC-GCA	0.00373
atpE	0	trnC-GCA-petN	0.00136
atpB	0.00017	petN-psbM	0.0095
rbcL	0.00081	psbM-trnD-GUC	0.00275
accD	0.0014	trnD-GUC-trnY-GUA	0.0075
psaI	0	trnY-GUA-trnE-UUC	0
ycf4	0.00158	trnE-UUC-trnT-GGU	0.00475
cemA	0.00019	trnT-GGU-psbD	0.00331
petA	0.00135	psbC-trnS-UGA	0.0044
psbJ	0	trnS-UGA-psbZ	0.00248
psbL	0	psbZ-trnG-UCC	0.01567
psbF	0	trnG-UCC-trnfM-CAU	0.00347
psbE	0	trnfM-CAU-rps14	0
petL	0	rps14-psaB	0
petG	0	psaB-psaA	0
psaJ	0	psaA-ycf3	0.00402
rpl33	0	ycf3 intron1	0.00304
rps18	0.00081	ycf3 intron2	0.00126
rpl20	0.00248	ycf3-trnS-GGA	0.00321
rps12	0.00067	trnS-GGA-rps4	0.00428
clpP	0.00156	rps4-trnT-UGU	0.00625
psbB	0.00051	trnT-UGU-trnL-UAA	0.00515
psbT	0	trnL-UAA intron	0.00427
psbN	0	trnL-UAA-trnF-GAA	0.0047
psbH	0	trnF-GAA-ndhJ	0.00284
petB	0.00135	ndhJ-ndhK	0.0055
petD	0.00319	ndhK-ndhC	0.00635
rpoA	0.00106	ndhC-trnV-UAC	0.00386
rps11	0.00059	trnV-UAC intron	0.00362
rpl36	0.00217	trnV-UAC-trnM-CAU	0.00324
infA	0.0054	trnM-CAU-atpE	0.00744
rps8	0.00193	atpB-rbcL	0.00494
rpl14	0	rbcL-accD	0.00182
rpl16	0.00033	accD-psaI	0.00496
rps3	0.00139	psaI-ycf4	0.00378
rpl22	0.00132	ycf4-cemA	0.00328
rps19	0.00198	cemA-petA	0.00271
rpl2	0.00016	petA-psbJ	0.00495
rpl23	0	psbJ-psbL	0.00095
ycf2	0.00021	psbL-psbF	0
ycf15	0.00359	psbF-psbE	0
ndhB	0.0007	psbE-petL	0.004
rps7	0	petL-petG	0.00417
ndhF	0.00304	petG-trnW-CCA	0.00402
rpl32	0.003	trnW-CCA-trnP-UGG	0.00269
ccsA	0.0027	trnP-UGG-psaJ	0.00413
ndhD	0.00067	psaJ-rpl33	0.00522
psaC	0.0017	rpl33-rps18	0.0084
ndhE	0	rps18-rpl20	0.00373
ndhG	0.00047	rpl20-rps12	0.0027
ndhI	0.00049	rps12-clpP	0.00142
ndhA	0.00012	clpP intron1	0.0061
ndhH	0.00271	clpP intron2	0.00433
rps15	0.00286	clpP-psbB	0.0024
ycf1	0.00298	psbB-psbT	0.00366
		psbT-psbN	0
		psbN-psbH	0.00238
		psbH-petB	0
		petB intron	0.0006
		petB-petD	0
		petD intron	0.00306
		petD-rpoA	0.00611
		rpoA-rps11	0.00544
		rps11-rpl36	0.00238
		rpl36-infA	0.00651
		infA-rps8	0.01376
		rps8-rpl14	0.00488
		rpl14-rpl16	0.00201
		rpl16 intron	0.00227
		rpl16-rps3	0
		rpl22-rps19	0.00219
		rps19-rpl2	0.04063
		rpl2 intron	0.0011
		rpl2-rpl23	0
		rpl23-trnI-CAU	0
		trnI-CAU-ycf2	0
		ycf2-ycf15	0
		ycf15-trnL-CAA	0
		trnL-CAA-ndhB	0.00061
		ndhB intron	0.00061
		ndhB-rps7	0
		rps7-rps12	0
		rps12 intron	0
		rps12-trnV-GAC	0.0004
		trnV-GAC-rrn16	0
		rrn16-trnI-GAU	0
		trnI-GAU intron	0
		trnI-GAU-trnA-UGC	0
		trnA-UGC intron	0.00053
		trnA-UGC-rrn23	0
		rrn23-rrn4.5	0
		rrn4.5-rrn5	0.00095
		rrn5-trnR-ACG	0.00097
		trnR-ACG-trnN-GUU	0.00039
		trnN-GUU-ndhF	0.00043
		ndhF-rpl32	0.00631
		rpl32-trnL-UAG	0.00431
		trnL-UAG-ccsA	0.0025
		ccsA-ndhD	0.0179
		ndhD-psaC	0.00853
		psaC-ndhE	0.00401
		ndhE-ndhG	0.00494
		ndhG-ndhI	0.00422
		ndhI-ndhA	0
		ndhA intron	0.00402
		ndhH-rps15	0.01097
		rps15-ycf1	0.00274
		ycf1-trnN-GUU	0.00232
