# Supplementary material for: Plastome structure, phylogeny and evolution of plastid genes in Reevesia (Helicteroideae, Malvaceae)
Source: Research Square preprint supplement (doi:10.21203/rs.3.rs-3774053/v1), 2023-12-28
Supplement: Supplementary file 6 [file f097e84ea0810eefa470cf24.xlsx]

## Sheet: R. botingensis (1)
Table S4. The comparison of SSRs among 15 Reevesia samples
ID	SSR nr.	SSR type	SSR	size	start	end	position		gene
R. botingensis (1)	1	p2	(AT)6	12	10456	10467	LSC	Intergenic spacer	trnR-UCU_atpA
R. botingensis (1)	2	p2	(AT)6	12	10478	10489	LSC	Intergenic spacer	trnR-UCU_atpA
R. botingensis (1)	3	p4	(AATA)3	12	12954	12965	LSC	Intron	atpF
R. botingensis (1)	4	p3	(TTA)4	12	13762	13773	LSC	Intergenic spacer	atpF_atpH
R. botingensis (1)	5	p1	(T)12	12	13852	13863	LSC	Intergenic spacer	atpF_atpH
R. botingensis (1)	6	p1	(A)13	13	15372	15384	LSC	Intergenic spacer	atpH_atpI
R. botingensis (1)	7	p4	(TATT)3	12	24067	24078	LSC	Intron	rpoC1
R. botingensis (1)	8	p1	(T)12	12	27292	27303	LSC	Exon	rpoB
R. botingensis (1)	9	p1	(A)13	13	30296	30308	LSC	Intergenic spacer	petN_psbM
R. botingensis (1)	10	p1	(A)13	13	30719	30731	LSC	Intergenic spacer	petN_psbM
R. botingensis (1)	11	p1	(T)15	15	30742	30756	LSC	Intergenic spacer	petN_psbM
R. botingensis (1)	12	p5	(TGAAA)3	15	34371	34385	LSC	Intergenic spacer	trnT-GGU_psbD
R. botingensis (1)	13	p2	(AT)6	12	34473	34484	LSC	Intergenic spacer	trnT-GGU_psbD
R. botingensis (1)	14	p2	(TA)6	12	37425	37436	LSC	Intergenic spacer	psbC-trnS_UGA
R. botingensis (1)	15	p3	(AAT)4	12	38346	38357	LSC	Intergenic spacer	psbZ-trnG_UCC
R. botingensis (1)	16	p1	(A)13	13	38382	38394	LSC	Intergenic spacer	psbZ-trnG_UCC
R. botingensis (1)	17	p4	(ATCT)3	12	44464	44475	LSC	Intergenic spacer	psaA_ycf3
R. botingensis (1)	18	p1	(T)12	12	46840	46851	LSC	Intron	ycf3
R. botingensis (1)	19	p1	(A)14	14	47209	47222	LSC	Intergenic spacer	ycf3_trnS-GGA
R. botingensis (1)	20	p1	(T)13	13	47810	47822	LSC	Intergenic spacer	ycf3_trnS-GGA
R. botingensis (1)	21	p2	(TA)6	12	49241	49252	LSC	Intergenic spacer	rps4_trnT-UGU
R. botingensis (1)	22	p1	(A)13	13	50760	50772	LSC	Intergenic spacer	trnT-UGU_trnL-UAA
R. botingensis (1)	23	p4	(AAAT)3	12	51037	51048	LSC	Intergenic spacer	trnT-UGU_trnL-UAA
R. botingensis (1)	24	p4	(TAGT)3	12	63736	63747	LSC	Intergenic spacer	accD_psaI
R. botingensis (1)	25	p3	(AAT)4	12	64180	64191	LSC	Intergenic spacer	psaI_ycf4
R. botingensis (1)	26	p1	(T)22	22	71663	71684	LSC	Intergenic spacer	petG_trnW-CCA
R. botingensis (1)	27	p1	(A)12	12	82201	82212	LSC	Intergenic spacer	petB_petD
R. botingensis (1)	28	p3	(TTA)4	12	82623	82634	LSC	Intron	petD
R. botingensis (1)	29	p5	(AAAAT)3	15	88084	88098	LSC	Intron	rpl16
R. botingensis (1)	30	p1	(T)12	12	105320	105331	IR	Intergenic spacer	rps12_trnV-GAC
R. botingensis (1)	31	p4	(ATTG)3	12	118408	118419	SSC	Intergenic spacer	nhhF_rpl32
R. botingensis (1)	32	p2	(TA)6	12	119089	119100	SSC	Intergenic spacer	nhhF_rpl32
R. botingensis (1)	33	p3	(AAT)4	12	119572	119583	SSC	Intergenic spacer	rpl32_trnL-UAG
R. botingensis (1)	34	p4	(TTGA)3	12	124134	124145	SSC	Exon	ndhE
R. botingensis (1)	35	p4	(GAAA)3	12	127148	127159	SSC	Intron	ndhA
R. botingensis (1)	36	p1	(T)13	13	135058	135070	SSC	Exon	ycf1
R. botingensis (1)	37	p4	(TCTT)3	12	135220	135231	SSC	Exon	ycf1
R. botingensis (1)	38	p1	(A)12	12	146427	146438	IR	Intergenic spacer	trnV_GAC-rps12

## Sheet: R. botingensis (2)
Table S4. The comparison of SSRs among 15 Reevesia samples
ID	SSR nr.	SSR type	SSR	size	start	end	position		gene
R. botingensis (2)	1	p4	(AATA)3	12	12874	12885	LSC	Intron	atpF
R. botingensis (2)	2	p3	(TTA)4	12	13682	13693	LSC	Intergenic spacer	atpF_atpH
R. botingensis (2)	3	p1	(T)12	12	13772	13783	LSC	Intergenic spacer	atpF_atpH
R. botingensis (2)	4	p1	(A)13	13	15321	15333	LSC	Intergenic spacer	atpH_atpI
R. botingensis (2)	5	p4	(TATT)3	12	23988	23999	LSC	Intron	rpoC1
R. botingensis (2)	6	p1	(T)12	12	27213	27224	LSC	Exon	rpoB
R. botingensis (2)	7	p1	(A)13	13	30114	30126	LSC	Intergenic spacer	petN_psbM
R. botingensis (2)	8	p1	(A)12	12	30267	30278	LSC	Intergenic spacer	petN_psbM
R. botingensis (2)	9	p1	(T)15	15	30290	30304	LSC	Intergenic spacer	petN_psbM
R. botingensis (2)	10	p5	(TGAAA)3	15	33842	33856	LSC	Intergenic spacer	trnT-GGU_psbD
R. botingensis (2)	11	p2	(AT)6	12	33944	33955	LSC	Intergenic spacer	trnT-GGU_psbD
R. botingensis (2)	12	p2	(TA)6	12	36896	36907	LSC	Intergenic spacer	psbC-trnS_UGA
R. botingensis (2)	13	p3	(AAT)4	12	37817	37828	LSC	Intergenic spacer	psbZ-trnG_UCC
R. botingensis (2)	14	p1	(A)13	13	37853	37865	LSC	Intergenic spacer	psbZ-trnG_UCC
R. botingensis (2)	15	p3	(AAT)5	15	38007	38021	LSC	Intergenic spacer	psbZ-trnG_UCC
R. botingensis (2)	16	p3	(AAT)30	90	38049	38138	LSC	Intergenic spacer	psbZ-trnG_UCC
R. botingensis (2)	17	p4	(ATCT)3	12	43930	43941	LSC	Intergenic spacer	psaA_ycf3
R. botingensis (2)	18	p1	(T)12	12	46556	46567	LSC	Intron	ycf3
R. botingensis (2)	19	p2	(TA)6	12	48280	48291	LSC	Intergenic spacer	rps4_trnT-UGU
R. botingensis (2)	20	p1	(A)13	13	49637	49649	LSC	Intergenic spacer	trnT-UGU_trnL-UAA
R. botingensis (2)	21	p4	(AAAT)3	12	49914	49925	LSC	Intergenic spacer	trnT-UGU_trnL-UAA
R. botingensis (2)	22	p4	(TAAA)3	12	50000	50011	LSC	Intergenic spacer	trnT-UGU_trnL-UAA
R. botingensis (2)	23	p4	(TAGT)3	12	62267	62278	LSC	Intergenic spacer	accD_psaI
R. botingensis (2)	24	p3	(AAT)4	12	62700	62711	LSC	Intergenic spacer	accD_psaI
R. botingensis (2)	25	p1	(T)22	22	70230	70251	LSC	Intergenic spacer	petG_trnW-CCA
R. botingensis (2)	26	p1	(A)12	12	80807	80818	LSC	Intergenic spacer	petB_petD
R. botingensis (2)	27	p3	(TTA)4	12	81229	81240	LSC	Intron	petD
R. botingensis (2)	28	p5	(AAAAT)3	15	86675	86689	LSC	Intron	rpl16
R. botingensis (2)	29	p1	(T)12	12	103908	103919	IR	Intergenic spacer	rps12_trnV-GAC
R. botingensis (2)	30	p4	(ATTG)3	12	117138	117149	SSC	Intergenic spacer	nhhF_rpl32
R. botingensis (2)	31	p2	(TA)6	12	117821	117832	SSC	Intergenic spacer	nhhF_rpl32
R. botingensis (2)	32	p3	(AAT)4	12	118304	118315	SSC	Intergenic spacer	rpl32_trnL-UAG
R. botingensis (2)	33	p4	(TTGA)3	12	122768	122779	SSC	Exon	ndhE
R. botingensis (2)	34	p4	(GAAA)3	12	125799	125810	SSC	Intron	ndhA
R. botingensis (2)	35	p1	(T)13	13	133690	133702	SSC	Exon	ycf1
R. botingensis (2)	36	p4	(TCTT)3	12	133852	133863	SSC	Exon	ycf1
R. botingensis (2)	37	p1	(A)12	12	145074	145085	IR	Intergenic spacer	trnV_GAC-rps12

## Sheet: R. glaucophylla
Table S4. The comparison of SSRs among 15 Reevesia samples
ID	SSR nr.	SSR type	SSR	size	start	end	position		gene
R. glaucophylla	1	p1	(A)12	12	5853	5864	LSC	Intron	rps16
R. glaucophylla	2	p4	(TTTA)3	12	8538	8549	LSC	Intergenic spacer	trnS-GCU_trnG-GCC
R. glaucophylla	3	p2	(TA)6	12	8729	8740	LSC	Intergenic spacer	trnS-GCU_trnG-GCC
R. glaucophylla	4	p1	(T)13	13	10038	10050	LSC	Intron	trnG-GCC
R. glaucophylla	5	p2	(AT)7	14	10495	10508	LSC	Intergenic spacer	trnR-UCU_atpA
R. glaucophylla	6	p2	(AT)6	12	10519	10530	LSC	Intergenic spacer	trnR-UCU_atpA
R. glaucophylla	7	p4	(AATA)3	12	12962	12973	LSC	Intron	atpF
R. glaucophylla	8	p1	(A)12	12	13648	13659	LSC	Intergenic spacer	atpF_atpH
R. glaucophylla	9	p1	(T)12	12	13884	13895	LSC	Intergenic spacer	atpF_atpH
R. glaucophylla	10	p1	(T)12	12	27388	27399	LSC	Exon	rpoB
R. glaucophylla	11	p1	(T)12	12	30834	30845	LSC	Intergenic spacer	petN_psbM
R. glaucophylla	12	p1	(T)12	12	33153	33164	LSC	Intergenic spacer	trnE-UUC_trnT-GGU
R. glaucophylla	13	p2	(TA)7	14	33449	33462	LSC	Intergenic spacer	trnE-UUC_trnT-GGU
R. glaucophylla	14	p5	(TGAAA)3	15	34500	34514	LSC	Intergenic spacer	trnT-GGU_psbD
R. glaucophylla	15	p2	(AT)7	14	34602	34615	LSC	Intergenic spacer	trnT-GGU_psbD
R. glaucophylla	16	p4	(ATCT)3	12	44492	44503	LSC	Intergenic spacer	psaA_ycf3
R. glaucophylla	17	p1	(T)12	12	44912	44923	LSC	Intergenic spacer	psaA_ycf3
R. glaucophylla	18	p1	(T)12	12	46133	46144	LSC	Intron	ycf3
R. glaucophylla	19	p4	(TTAT)3	12	48129	48140	LSC	Intergenic spacer	ycf3_trnS_GGA
R. glaucophylla	20	p2	(AT)8	16	49537	49552	LSC	Intergenic spacer	rps4_trnT-UGU
R. glaucophylla	21	p4	(AAAT)3	12	51407	51418	LSC	Intergenic spacer	trnT-UGU_trnL-UAA
R. glaucophylla	22	p4	(AGTT)3	12	64091	64102	LSC	Intergenic spacer	accD_psaI
R. glaucophylla	23	p3	(AAT)4	12	64540	64551	LSC	Intergenic spacer	accD_psaI
R. glaucophylla	24	p1	(T)12	12	64969	64980	LSC	Intergenic spacer	psaI_yvf4
R. glaucophylla	25	p1	(A)15	15	76778	76792	LSC	Intron	clpP
R. glaucophylla	26	p1	(T)17	17	77789	77805	LSC	Intron	clpP
R. glaucophylla	27	p1	(T)14	14	82972	82985	LSC	Intron	petD
R. glaucophylla	28	p3	(TTA)4	12	83041	83052	LSC	Intron	petD
R. glaucophylla	29	p1	(T)13	13	105754	105766	IR	Intergenic spacer	rps12_trnV-GAC
R. glaucophylla	30	p4	(ATTG)3	12	118842	118853	SSC	Intergenic spacer	ndhF_rpl32
R. glaucophylla	31	p2	(TA)6	12	119514	119525	SSC	Intergenic spacer	ndhF_rpl32
R. glaucophylla	32	p4	(TTGA)3	12	124509	124520	SSC	Exon	ndhE
R. glaucophylla	33	p4	(GAAA)3	12	127534	127545	SSC	Intron	ndhA
R. glaucophylla	34	p4	(TCTT)3	12	135627	135638	SSC	Exon	ycf1
R. glaucophylla	35	p1	(A)13	13	146845	146857	IR	Intergenic spacer	trnV-GAC_rps12

## Sheet: R. lofouensis
Table S4. The comparison of SSRs among 15 Reevesia samples
ID	SSR nr.	SSR type	SSR	size	start	end	position		gene
R. lofouensis	1	p1	(A)13	13	5854	5866	LSC	Intron	rps16
R. lofouensis	2	p4	(TTTA)3	12	8540	8551	LSC	Intergenic spacer	trnS-GCU_trnG-GCC
R. lofouensis	3	p2	(TA)6	12	8731	8742	LSC	Intergenic spacer	trnS-GCU_trnG-GCC
R. lofouensis	4	p1	(T)13	13	10040	10052	LSC	Intron	trnG-GCC
R. lofouensis	5	p2	(AT)7	14	10497	10510	LSC	Intergenic spacer	trnR-UCU_atpA
R. lofouensis	6	p2	(AT)6	12	10521	10532	LSC	Intergenic spacer	trnR-UCU_atpA
R. lofouensis	7	p4	(AATA)3	12	12964	12975	LSC	Intron	atpF
R. lofouensis	8	p1	(A)12	12	13650	13661	LSC	Intergenic spacer	atpF_atpH
R. lofouensis	9	p1	(T)12	12	13887	13898	LSC	Intergenic spacer	atpF_atpH
R. lofouensis	10	p1	(C)12	12	23563	23574	LSC	Intron	rpoC1
R. lofouensis	11	p1	(T)12	12	27338	27349	LSC	Exon	rpoB
R. lofouensis	12	p2	(TA)7	14	33391	33404	LSC	Intergenic spacer	trnE-UUC_trnT-GGU
R. lofouensis	13	p5	(TGAAA)3	15	34442	34456	LSC	Intergenic spacer	trnT-GGU_psbD
R. lofouensis	14	p2	(AT)7	14	34544	34557	LSC	Intergenic spacer	trnT-GGU_psbD
R. lofouensis	15	p4	(ATCT)3	12	44435	44446	LSC	Intergenic spacer	psaA_ycf3
R. lofouensis	16	p1	(T)12	12	44855	44866	LSC	Intergenic spacer	psaA_ycf3
R. lofouensis	17	p1	(T)12	12	46076	46087	LSC	Intron	ycf3
R. lofouensis	18	p4	(TTAT)3	12	48072	48083	LSC	Intergenic spacer	ycf3_trnS_GGA
R. lofouensis	19	p2	(AT)8	16	49478	49493	LSC	Intergenic spacer	rps4_trnT-UGU
R. lofouensis	20	p1	(T)13	13	50211	50223	LSC	Intergenic spacer	trnT-UGU_trnL-UAA
R. lofouensis	21	p4	(AAAT)3	12	51361	51372	LSC	Intergenic spacer	trnT-UGU_trnL-UAA
R. lofouensis	22	p1	(T)13	13	55749	55761	LSC	Intergenic spacer	ndhC_trnV-UAC
R. lofouensis	23	p4	(AGTT)3	12	64051	64062	LSC	Intergenic spacer	accD_psaI
R. lofouensis	24	p3	(AAT)4	12	64499	64510	LSC	Intergenic spacer	accD_psaI
R. lofouensis	25	p1	(A)13	13	76739	76751	LSC	Intron	clpP
R. lofouensis	26	p1	(T)16	16	77748	77763	LSC	Intron	clpP
R. lofouensis	27	p1	(T)14	14	82930	82943	LSC	Intron	petD
R. lofouensis	28	p3	(TTA)4	12	82999	83010	LSC	Intron	petD
R. lofouensis	29	p3	(TTA)4	12	90643	90654	IR	Intergenic spacer	rps19_rpl2
R. lofouensis	30	p1	(T)12	12	105706	105717	IR	Intergenic spacer	rps12_trnV-GAC
R. lofouensis	31	p4	(ATTG)3	12	118794	118805	SSC	Intergenic spacer	ndhF_rpl32
R. lofouensis	32	p2	(TA)6	12	119467	119478	SSC	Intergenic spacer	ndhF_rpl32
R. lofouensis	33	p1	(T)14	14	119822	119835	SSC	Intergenic spacer	rpl32_trnL-UAG
R. lofouensis	34	p4	(TTGA)3	12	124466	124477	SSC	Exon	ndhE
R. lofouensis	35	p4	(GAAA)3	12	127491	127502	SSC	Intron	ndhA
R. lofouensis	36	p4	(TCTT)3	12	135583	135594	SSC	Exon	ycf1
R. lofouensis	37	p1	(A)12	12	146802	146813	IR	Intergenic spacer	trnV-GAC_rps12
R. lofouensis	38	p3	(TAA)4	12	161865	161876	IR	Intergenic spacer	rpl2_end

## Sheet: R. longipetiolata
Table S4. The comparison of SSRs among 15 Reevesia samples
ID	SSR nr.	SSR type	SSR	size	start	end	position		gene
R. longipetiolata	1	p1	(T)12	12	7963	7974	LSC	Intergenic spacer	psbK_psbI
R. longipetiolata	2	p2	(TA)6	12	8691	8702	LSC	Intergenic spacer	trnS-GCU_trnG-GCC
R. longipetiolata	3	p2	(AT)6	12	10450	10461	LSC	Intergenic spacer	trnR-UCU_atpA
R. longipetiolata	4	p2	(AT)7	14	10472	10485	LSC	Intergenic spacer	trnR-UCU_atpA
R. longipetiolata	5	p1	(T)12	12	12690	12701	LSC	Intron	atpF
R. longipetiolata	6	p4	(AATA)3	12	12957	12968	LSC	Intron	atpF
R. longipetiolata	7	p1	(T)12	12	27323	27334	LSC	Exon	rpoB
R. longipetiolata	8	p1	(A)12	12	31718	31729	LSC	Intergenic spacer	psbM
R. longipetiolata	9	p2	(TA)7	14	33369	33382	LSC	Intergenic spacer	trnE-UUC_trnT-GGU
R. longipetiolata	10	p5	(TGAAA)3	15	34414	34428	LSC	Intergenic spacer	trnT-GGU_psbD
R. longipetiolata	11	p1	(A)12	12	38396	38407	LSC	Intergenic spacer	psbZ_trnG-UCC
R. longipetiolata	12	p1	(A)13	13	38515	38527	LSC	Intergenic spacer	psbZ_trnG-UCC
R. longipetiolata	13	p4	(ATCT)3	12	44409	44420	LSC	Intergenic spacer	psaA_ycf3
R. longipetiolata	14	p1	(T)12	12	44827	44838	LSC	Intergenic spacer	psaA_ycf3
R. longipetiolata	15	p3	(AAT)4	12	45180	45191	LSC	Intergenic spacer	psaA_-ycf3
R. longipetiolata	16	p2	(AT)7	14	49424	49437	LSC	Intergenic spacer	rps4_trnT-UGU
R. longipetiolata	17	p1	(T)12	12	49620	49631	LSC	Intergenic spacer	rps4_trnT-UGU
R. longipetiolata	18	p1	(A)14	14	51038	51051	LSC	Intergenic spacer	trnT-UGU_trnL-UAA
R. longipetiolata	19	p4	(AAAT)3	12	51315	51326	LSC	Intergenic spacer	trnT-UGU_trnL-UAA
R. longipetiolata	20	p4	(AGTT)3	12	63956	63967	LSC	Intergenic spacer	accD_psaI
R. longipetiolata	21	p3	(AAT)4	12	64398	64409	LSC	Intergenic spacer	accD_psaI
R. longipetiolata	22	p1	(T)12	12	67562	67573	LSC	Intergenic spacer	cemA_petA
R. longipetiolata	23	p1	(T)12	12	76468	76479	LSC	Intron	clpP
R. longipetiolata	24	p2	(AT)9	18	76663	76680	LSC	Intron	clpP
R. longipetiolata	25	p1	(A)13	13	76686	76698	LSC	Intron	clpP
R. longipetiolata	26	p1	(T)17	17	77709	77725	LSC	Intron	clpP
R. longipetiolata	27	p3	(TAA)4	12	78158	78169	LSC	Intergenic spacer	clpP_psbB
R. longipetiolata	28	p1	(T)14	14	82896	82909	LSC	Intron	petD
R. longipetiolata	29	p3	(TTA)4	12	82965	82976	LSC	Intron	petD
R. longipetiolata	30	p1	(T)12	12	84033	84044	LSC	Intergenic spacer	petD_rpoA
R. longipetiolata	31	p1	(T)18	18	90611	90628	IR	Intergenic spacer	rps19_rpl2
R. longipetiolata	32	p1	(T)12	12	105669	105680	IR	Intergenic spacer	rps12_trnV-GAC
R. longipetiolata	33	p5	(TAAAG)3	15	111308	111322	IR	Intergenic spacer	trnA-UGC_rrn23
R. longipetiolata	34	p4	(ATTG)3	12	118763	118774	SSC	Intergenic spacer	ndhF_rpl32
R. longipetiolata	35	p1	(T)13	13	119393	119405	SSC	Intergenic spacer	ndhF_rpl32
R. longipetiolata	36	p2	(TA)8	16	119434	119449	SSC	Intergenic spacer	ndhF_rpl32
R. longipetiolata	37	p4	(TTGA)3	12	124439	124450	SSC	Exon	ndhE
R. longipetiolata	38	p4	(TCTT)3	12	135533	135544	SSC	Exon	ycf1
R. longipetiolata	39	p5	(ACTTT)3	15	141109	141123	IR	Intergenic spacer	rrn23_trnA-UGC
R. longipetiolata	40	p1	(A)12	12	146752	146763	IR	Intergenic spacer	trnV-GAC_rps12
R. longipetiolata	41	c*	(TAA)3(T<AA>AAAAAAAAAAAAAAAATGAC)(A)17	28	161794	161821	IR	Intergenic spacer	rpl2_end

## Sheet: R. membranacea (1)
Table S4. The comparison of SSRs among 15 Reevesia samples
ID	SSR nr.	SSR type	SSR	size	start	end	position		gene
R. membranacea (1)	1	p1	(A)12	12	5854	5865	LSC	Intron	rps16
R. membranacea (1)	2	p4	(TTTA)3	12	8540	8551	LSC	Intergenic spacer	trnS-GCU-trnG-GCC
R. membranacea (1)	3	p2	(TA)6	12	8731	8742	LSC	Intergenic spacer	trnS-GCU-trnG-GCC
R. membranacea (1)	4	p1	(T)14	14	10040	10053	LSC	Intron	trnG-GCC
R. membranacea (1)	5	p2	(AT)7	14	10498	10511	LSC	Intergenic spacer	trnR-UCU-atpA
R. membranacea (1)	6	p2	(AT)6	12	10522	10533	LSC	Intergenic spacer	trnR-UCU-atpA
R. membranacea (1)	7	p4	(AATA)3	12	12965	12976	LSC	Intron	atpF
R. membranacea (1)	8	p1	(A)12	12	13651	13662	LSC	Intergenic spacer	atpF_atpH
R. membranacea (1)	9	p1	(T)12	12	13887	13898	LSC	Intergenic spacer	atpF_atpH
R. membranacea (1)	10	p1	(T)12	12	27335	27346	LSC	Exon	rpoB
R. membranacea (1)	11	p1	(T)12	12	30779	30790	LSC	Intergenic spacer	petN_psbM
R. membranacea (1)	12	p2	(TA)7	14	33393	33406	LSC	Intergenic spacer	trnE-UUC-trnT-GGU
R. membranacea (1)	13	p5	(TGAAA)3	15	34445	34459	LSC	Intergenic spacer	trnT-GGU_psbD
R. membranacea (1)	14	p2	(AT)7	14	34547	34560	LSC	Intergenic spacer	trnT-GGU_psbD
R. membranacea (1)	15	p4	(ATCT)3	12	44438	44449	LSC	Intergenic spacer	psaA_ycf3
R. membranacea (1)	16	p1	(T)13	13	44858	44870	LSC	Intergenic spacer	psaA_ycf3
R. membranacea (1)	17	p4	(TTAT)3	12	48075	48086	LSC	Intergenic spacer	ycf3_trnS_GGA
R. membranacea (1)	18	p2	(AT)8	16	49483	49498	LSC	Intergenic spacer	rps4_trnT-UGU
R. membranacea (1)	19	p4	(AAAT)3	12	51325	51336	LSC	Intergenic spacer	trnT-UGU_trnL-UAA
R. membranacea (1)	20	p4	(AGTT)3	12	64011	64022	LSC	Intergenic spacer	accD_psaI
R. membranacea (1)	21	p3	(AAT)4	12	64460	64471	LSC	Intergenic spacer	accD_psaI
R. membranacea (1)	22	p1	(T)12	12	66339	66350	LSC	Intergenic spacer	ycf4_cemA
R. membranacea (1)	23	p1	(T)12	12	74367	74378	LSC	Intergenic spacer	rps18_rpl20
R. membranacea (1)	24	p1	(A)16	16	76687	76702	LSC	Intron	clpP
R. membranacea (1)	25	p1	(T)15	15	77699	77713	LSC	Intron	clpP
R. membranacea (1)	26	p1	(T)14	14	82880	82893	LSC	Intron	petD
R. membranacea (1)	27	p3	(TTA)4	12	82949	82960	LSC	Intron	petD
R. membranacea (1)	28	p1	(T)13	13	105661	105673	IR	Intergenic spacer	rps12_trnV-GAC
R. membranacea (1)	29	p4	(ATTG)3	12	118749	118760	SSC	Intergenic spacer	ndhF_rpl32
R. membranacea (1)	30	p2	(TA)6	12	119419	119430	SSC	Intergenic spacer	ndhF_rpl32
R. membranacea (1)	31	p1	(T)13	13	119773	119785	SSC	Intergenic spacer	rpl32_trnL-UAG
R. membranacea (1)	32	p4	(TTGA)3	12	124416	124427	SSC	Exon	ndhE
R. membranacea (1)	33	p4	(GAAA)3	12	127441	127452	SSC	Intron	ndhA
R. membranacea (1)	34	p4	(TCTT)3	12	135534	135545	SSC	Exon	ycf1
R. membranacea (1)	35	p1	(A)13	13	146752	146764	IR	Intergenic spacer	trnV-GAC_rps12

## Sheet: R. membranacea (2)
Table S4. The comparison of SSRs among 15 Reevesia samples
ID	SSR nr.	SSR type	SSR	size	start	end	position		gene
R. membranacea (2)	1	p1	(A)12	12	5854	5865	LSC	Intron	rps16
R. membranacea (2)	2	p4	(TTTA)3	12	8540	8551	LSC	Intergenic spacer	trnS-GCU-trnG-GCC
R. membranacea (2)	3	p2	(TA)6	12	8731	8742	LSC	Intergenic spacer	trnS-GCU-trnG-GCC
R. membranacea (2)	4	p1	(T)14	14	10040	10053	LSC	Intron	trnG-GCC
R. membranacea (2)	5	p2	(AT)7	14	10498	10511	LSC	Intergenic spacer	trnR-UCU-atpA
R. membranacea (2)	6	p2	(AT)6	12	10522	10533	LSC	Intron	trnR-UCU-atpA
R. membranacea (2)	7	p4	(AATA)3	12	12965	12976	LSC	Intron	atpF
R. membranacea (2)	8	p1	(A)12	12	13651	13662	LSC	Intergenic spacer	atpF_atpH
R. membranacea (2)	9	p1	(T)12	12	13887	13898	LSC	Intergenic spacer	atpF_atpH
R. membranacea (2)	10	p1	(T)12	12	27335	27346	LSC	Exon	rpoB
R. membranacea (2)	11	p1	(T)12	12	30779	30790	LSC	Intergenic spacer	petN_psbM
R. membranacea (2)	12	p2	(TA)7	14	33393	33406	LSC	Intergenic spacer	trnE-UUC-trnT-GGU
R. membranacea (2)	13	p5	(TGAAA)3	15	34445	34459	LSC	Intergenic spacer	trnT-GGU_psbD
R. membranacea (2)	14	p2	(AT)7	14	34547	34560	LSC	Intergenic spacer	trnT-GGU_psbD
R. membranacea (2)	15	p4	(ATCT)3	12	44438	44449	LSC	Intergenic spacer	psaA_ycf3
R. membranacea (2)	16	p1	(T)13	13	44858	44870	LSC	Intergenic spacer	psaA_ycf3
R. membranacea (2)	17	p4	(TTAT)3	12	48075	48086	LSC	Intergenic spacer	ycf3_trnS_GGA
R. membranacea (2)	18	p2	(AT)8	16	49483	49498	LSC	Intergenic spacer	rps4_trnT-UGU
R. membranacea (2)	19	p4	(AAAT)3	12	51325	51336	LSC	Intergenic spacer	trnT-UGU_trnL-UAA
R. membranacea (2)	20	p1	(T)12	12	55711	55722	LSC	Intergenic spacer	ndhC_trnV-UAC
R. membranacea (2)	21	p4	(AGTT)3	12	64012	64023	LSC	Intergenic spacer	accD_psaI
R. membranacea (2)	22	p3	(AAT)4	12	64461	64472	LSC	Intergenic spacer	accD_psaI
R. membranacea (2)	23	p1	(T)12	12	66340	66351	LSC	Intergenic spacer	ycf4_cemA
R. membranacea (2)	24	p1	(T)12	12	74368	74379	LSC	Intergenic spacer	rps18_rpl20
R. membranacea (2)	25	p1	(A)16	16	76688	76703	LSC	Intron	clpP
R. membranacea (2)	26	p1	(T)15	15	77700	77714	LSC	Intron	clpP
R. membranacea (2)	27	p1	(T)14	14	82881	82894	LSC	Intron	petD
R. membranacea (2)	28	p3	(TTA)4	12	82950	82961	LSC	Intron	petD
R. membranacea (2)	29	p1	(T)13	13	105662	105674	IR	Intergenic spacer	rps12_trnV-GAC
R. membranacea (2)	30	p4	(ATTG)3	12	118750	118761	SSC	Intergenic spacer	ndhF_rpl32
R. membranacea (2)	31	p2	(TA)6	12	119420	119431	SSC	Intergenic spacer	ndhF_rpl32
R. membranacea (2)	32	p1	(T)13	13	119774	119786	SSC	Intergenic spacer	rpl32_trnL-UAG
R. membranacea (2)	33	p4	(TTGA)3	12	124417	124428	SSC	Exon	ndhE
R. membranacea (2)	34	p4	(GAAA)3	12	127442	127453	SSC	Intron	ndhA
R. membranacea (2)	35	p4	(TCTT)3	12	135535	135546	SSC	Exon	ycf1
R. membranacea (2)	36	p1	(A)13	13	146753	146765	IR	Intergenic spacer	trnV-GAC_rps12

## Sheet: R. orbicularifolia
Table S4. The comparison of SSRs among 15 Reevesia samples
ID	SSR nr.	SSR type	SSR	size	start	end	position		gene
R. orbicularifolia	1	p1	(T)12	12	170	181	LSC	Intergenic spacer	trnH-GUG_psbA
R. orbicularifolia	2	p4	(TTTA)3	12	8532	8543	LSC	Intergenic spacer	trnS-GCU_trnG-GCC
R. orbicularifolia	3	p2	(TA)6	12	8694	8705	LSC	Intergenic spacer	trnS-GCU_trnG-GCC
R. orbicularifolia	4	p2	(AT)6	12	10462	10473	LSC	Intergenic spacer	trnR-UCU_atpA
R. orbicularifolia	5	p2	(AT)6	12	10484	10495	LSC	Intergenic spacer	trnR-UCU_atpA
R. orbicularifolia	6	p4	(AATA)3	12	12955	12966	LSC	Intron	atpF
R. orbicularifolia	7	p1	(A)12	12	13642	13653	LSC	Intergenic spacer	atpF_atpH
R. orbicularifolia	8	p1	(T)12	12	13753	13764	LSC	Intergenic spacer	atpF_atpH
R. orbicularifolia	9	p1	(A)13	13	15070	15082	LSC	Intergenic spacer	atpH_atpI
R. orbicularifolia	10	p1	(T)12	12	27276	27287	LSC	Exon	rpoB
R. orbicularifolia	11	p1	(A)13	13	31661	31673	LSC	Intergenic spacer	psbM_trnD-GUC
R. orbicularifolia	12	p2	(TA)7	14	33313	33326	LSC	Intergenic spacer	trnE-UUC_trnT-GGU
R. orbicularifolia	13	p5	(TGAAA)3	15	34373	34387	LSC	Intergenic spacer	trnT-GGU_psdB
R. orbicularifolia	14	p2	(AT)7	14	34475	34488	LSC	Intergenic spacer	trnT-GGU_psdB
R. orbicularifolia	15	p4	(ATCT)3	12	44359	44370	LSC	Intergenic spacer	psaA_ycf3
R. orbicularifolia	16	p4	(TTAT)3	12	47982	47993	LSC	Intergenic spacer	ycf3_trnS-GGA
R. orbicularifolia	17	p1	(T)12	12	48400	48411	LSC	Intergenic spacer	trnS-GGA_rps4
R. orbicularifolia	18	p2	(AT)8	16	49391	49406	LSC	Intergenic spacer	rps4_trnT-UGU
R. orbicularifolia	19	p1	(A)12	12	50040	50051	LSC	Intergenic spacer	trnT-UGU_trnL-UAA
R. orbicularifolia	20	p1	(A)12	12	50927	50938	LSC	Intergenic spacer	trnT-UGU_trnL-UAA
R. orbicularifolia	21	p4	(AAAT)3	12	51202	51213	LSC	Intergenic spacer	trnT-UGU_trnL-UAA
R. orbicularifolia	22	p1	(T)14	14	55586	55599	LSC	Intergenic spacer	ndhC_trnV-UAC
R. orbicularifolia	23	p4	(AGTT)3	12	63891	63902	LSC	Intergenic spacer	accD_psaI
R. orbicularifolia	24	p3	(AAT)4	12	64355	64366	LSC	Intergenic spacer	accD_psaI
R. orbicularifolia	25	p5	(CATTT)3	15	74360	74374	LSC	Intergenic spacer	rps18_rpl20
R. orbicularifolia	26	p1	(T)12	12	76563	76574	LSC	Intron	clpP
R. orbicularifolia	27	p1	(A)12	12	76576	76587	LSC	Intron	clpP
R. orbicularifolia	28	p1	(T)15	15	77594	77608	LSC	Intron	clpP
R. orbicularifolia	29	p3	(TAA)4	12	78041	78052	LSC	Intergenic spacer	clpP_psbB
R. orbicularifolia	30	p1	(T)14	14	82779	82792	LSC	Intron	petD
R. orbicularifolia	31	p3	(TTA)4	12	82848	82859	LSC	Intron	petD
R. orbicularifolia	32	p1	(T)14	14	86212	86225	LSC	Intergenic spacer	infA_rps8
R. orbicularifolia	33	p1	(T)12	12	105592	105603	IR	Intergenic spacer	rps12_trnV-GAC
R. orbicularifolia	34	p4	(ATTG)3	12	118681	118692	SSC	Intergenic spacer	ndhF_rpl32
R. orbicularifolia	35	p1	(T)12	12	119314	119325	SSC	Intergenic spacer	ndhF_rpl32
R. orbicularifolia	36	p2	(TA)6	12	119354	119365	SSC	Intergenic spacer	ndhF_rpl32
R. orbicularifolia	37	p1	(T)14	14	119702	119715	SSC	Intergenic spacer	rpl32_trnL-UAG
R. orbicularifolia	38	p4	(TTGA)3	12	124348	124359	SSC	Exon	ndhE
R. orbicularifolia	39	p1	(T)12	12	125468	125479	SSC	Intergenic spacer	ndhG_ndhI
R. orbicularifolia	40	p4	(GAAA)3	12	127368	127379	SSC	Intron	ndhA
R. orbicularifolia	41	p4	(TCTT)3	12	135462	135473	SSC	Exon	ycf1
R. orbicularifolia	42	p1	(A)12	12	146680	146691	IR	Intergenic spacer	trnV-GAC_rps12

## Sheet: R. pubescens
Table S4. The comparison of SSRs among 15 Reevesia samples
ID	SSR nr.	SSR type	SSR	size	start	end	position		gene
R. pubescens	1	p4	(TTTA)3	12	8534	8545	LSC	Intergenic spacer	trnS-GCU_trnG-GCC
R. pubescens	2	p2	(TA)6	12	8696	8707	LSC	Intergenic spacer	trnS-GCU_trnG-GCC
R. pubescens	3	p2	(AT)6	12	10462	10473	LSC	Intergenic spacer	trnR-UCU_atpA
R. pubescens	4	p2	(AT)6	12	10484	10495	LSC	Intergenic spacer	trnR-UCU_atpA
R. pubescens	5	p1	(T)12	12	12675	12686	LSC	Intron	atpF
R. pubescens	6	p4	(AATA)3	12	12942	12953	LSC	Intron	atpF
R. pubescens	7	p1	(T)12	12	13030	13041	LSC	Intron	atpF
R. pubescens	8	p1	(T)12	12	13865	13876	LSC	Intergenic spacer	atpF_atpH
R. pubescens	9	p1	(T)12	12	27315	27326	LSC	Exon	rpoB
R. pubescens	10	p1	(T)13	13	30745	30757	LSC	Intergenic spacer	petN_psbM
R. pubescens	11	p1	(A)15	15	31709	31723	LSC	Intergenic spacer	psbM_trnD-GUC
R. pubescens	12	p2	(TA)7	14	33361	33374	LSC	Intergenic spacer	trnE-UUC_trnT-GGU
R. pubescens	13	p5	(TGAAA)3	15	34448	34462	LSC	Intergenic spacer	trnT-GGU_psbD
R. pubescens	14	p2	(AT)6	12	34550	34561	LSC	Intergenic spacer	trnT-GGU_psbD
R. pubescens	15	c*	(TATTA)2……(TAT)3	22	38594	38615	LSC	Intergenic spacer	psbZ_trnG-UCC
R. pubescens	16	p4	(ATCT)3	12	44454	44465	LSC	Intergenic spacer	psaA_ycf3
R. pubescens	17	p1	(T)12	12	44870	44881	LSC	Intergenic spacer	psaA_ycf3
R. pubescens	18	p3	(AAT)4	12	45223	45234	LSC	Intergenic spacer	psaA_ycf3
R. pubescens	19	p4	(TTAT)3	12	48080	48091	LSC	Intergenic spacer	ycf3_trnS-GGA
R. pubescens	20	p1	(T)13	13	48500	48512	LSC	Intergenic spacer	trnS-GGA_rps4
R. pubescens	21	p2	(AT)8	16	49492	49507	LSC	Intergenic spacer	rps4_trnT-UGU
R. pubescens	22	p1	(A)13	13	51041	51053	LSC	Intergenic spacer	trnT-UGU_trnL-UAA
R. pubescens	23	p4	(AAAT)3	12	51317	51328	LSC	Intergenic spacer	trnT-UGU_trnL-UAA
R. pubescens	24	p1	(T)13	13	55679	55691	LSC	Intergenic spacer	ndhC_trnV-UAC
R. pubescens	25	p4	(AGTT)3	12	63983	63994	LSC	Intergenic spacer	accD_psaI
R. pubescens	26	p3	(AAT)4	12	64429	64440	LSC	Intergenic spacer	accD_psaI
R. pubescens	27	p2	(TA)7	14	73529	73542	LSC	Intergenic spacer	rpl33_rps18
R. pubescens	28	p1	(T)12	12	76452	76463	LSC	Intron	clpP
R. pubescens	29	p1	(A)14	14	76633	76646	LSC	Intron	clpP
R. pubescens	30	p1	(T)16	16	77651	77666	LSC	Intron	clpP
R. pubescens	31	p3	(TAA)4	12	78099	78110	LSC	Intergenic spacer	clpP_psbB
R. pubescens	32	p1	(T)13	13	82836	82848	LSC	Intron	petD
R. pubescens	33	p3	(TTA)4	12	82904	82915	LSC	Intron	petD
R. pubescens	34	p1	(T)12	12	86247	86258	LSC	Intergenic spacer	infA_rps8
R. pubescens	35	p1	(T)12	12	105615	105626	IR	Intergenic spacer	rps12_trnV-GAC
R. pubescens	36	p4	(ATTG)3	12	118703	118714	SSC	Intergenic spacer	ndhF_rpl32
R. pubescens	37	p1	(T)14	14	119334	119347	SSC	Intergenic spacer	ndhF_rpl32
R. pubescens	38	p2	(TA)6	12	119376	119387	SSC	Intergenic spacer	ndhF_rpl32
R. pubescens	39	p4	(TTGA)3	12	124385	124396	SSC	Exon	ndhE
R. pubescens	40	p4	(GAAA)3	12	127403	127414	SSC	Intron	ndhA
R. pubescens	41	p1	(C)12	12	130216	130227	SSC	Intergenic spacer	rps15_ycf1
R. pubescens	42	p4	(TCTT)3	12	135475	135486	SSC	Exon	ycf1
R. pubescens	43	p1	(A)12	12	146693	146704	IR	Intergenic spacer	trnV-GAC_rps12

## Sheet: R. pycnantha
Table S4. The comparison of SSRs among 15 Reevesia samples
ID	SSR nr.	SSR type	SSR	size	start	end	position		gene
R. pycnantha	1	p4	(TTTA)3	12	8553	8564	LSC	Intergenic spacer	trnS-GCU_trnG-GCC
R. pycnantha	2	p2	(TA)6	12	8744	8755	LSC	Intergenic spacer	trnS-GCU_trnG-GCC
R. pycnantha	3	p1	(T)13	13	9642	9654	LSC	Intron	trnG-GCC
R. pycnantha	4	p1	(T)14	14	10056	10069	LSC	Intron	trnG-GCC
R. pycnantha	5	p2	(AT)7	14	10514	10527	LSC	Intergenic spacer	trnR-UCU_atpA
R. pycnantha	6	p2	(AT)6	12	10538	10549	LSC	Intergenic spacer	trnR-UCU_atpA
R. pycnantha	7	p1	(T)12	12	12729	12740	LSC	Intron	atpF
R. pycnantha	8	p4	(AATA)3	12	12996	13007	LSC	Intron	atpF
R. pycnantha	9	p1	(A)12	12	13683	13694	LSC	Intergenic spacer	atpF_atpH
R. pycnantha	10	p1	(T)12	12	13794	13805	LSC	Intergenic spacer	atpF_atpH
R. pycnantha	11	p1	(T)12	12	27368	27379	LSC	Exon	rpoB
R. pycnantha	12	p1	(T)14	14	30458	30471	LSC	Intergenic spacer	petN_psbM
R. pycnantha	13	p2	(TA)7	14	33422	33435	LSC	Intergenic spacer	trnE-UUC_trnT-GGU
R. pycnantha	14	p5	(TGAAA)3	15	34473	34487	LSC	Intergenic spacer	trnT-GGU_psbD
R. pycnantha	15	p2	(AT)7	14	34575	34588	LSC	Intergenic spacer	trnT-GGU_psbD
R. pycnantha	16	p4	(ATCT)3	12	44467	44478	LSC	Intergenic spacer	psaA_ycf3
R. pycnantha	17	p1	(T)12	12	44887	44898	LSC	Intergenic spacer	psaA_ycf3
R. pycnantha	18	p1	(T)12	12	46108	46119	LSC	Intron	ycf3
R. pycnantha	19	p4	(TTAT)3	12	48103	48114	LSC	Intergenic spacer	ycf3_trnS-GGA
R. pycnantha	20	p2	(AT)8	16	49512	49527	LSC	Intergenic spacer	rps4_trnT-UGU
R. pycnantha	21	p1	(A)13	13	51119	51131	LSC	Intergenic spacer	trnT-UGU_trnL-UAA
R. pycnantha	22	p4	(AAAT)3	12	51395	51406	LSC	Intergenic spacer	trnT-UGU_trnL-UAA
R. pycnantha	23	p4	(AGTT)3	12	64097	64108	LSC	Intergenic spacer	accD_psaI
R. pycnantha	24	p3	(AAT)4	12	64544	64555	LSC	Intergenic spacer	accD_psaI
R. pycnantha	25	p1	(T)13	13	76597	76609	LSC	Intron	clpP
R. pycnantha	26	p1	(A)13	13	76775	76787	LSC	Intron	clpP
R. pycnantha	27	p1	(T)15	15	77783	77797	LSC	Intron	clpP
R. pycnantha	28	p3	(TAA)4	12	78230	78241	LSC	Intergenic spacer	clpP_psbB
R. pycnantha	29	p1	(T)13	13	82968	82980	LSC	Intron	petD
R. pycnantha	30	p3	(TTA)4	12	83036	83047	LSC	Intron	petD
R. pycnantha	31	p1	(T)12	12	105757	105768	IR	Intergenic spacer	rps12_trnV-GAC
R. pycnantha	32	p4	(ATTG)3	12	118844	118855	SSC	Intergenic spacer	ndhF_rpl32
R. pycnantha	33	p1	(T)16	16	118959	118974	SSC	Intergenic spacer	ndhF_rpl32
R. pycnantha	34	p2	(TA)6	12	119519	119530	SSC	Intergenic spacer	ndhF_rpl32
R. pycnantha	35	p1	(T)15	15	119873	119887	SSC	Intergenic spacer	rpl32_trnL-UAG
R. pycnantha	36	p4	(TTGA)3	12	124518	124529	SSC	Exon	ndhE
R. pycnantha	37	p1	(T)12	12	125638	125649	SSC	Intergenic spacer	ndhG_ndhI
R. pycnantha	38	p4	(GAAA)3	12	127545	127556	SSC	Intron	ndhA
R. pycnantha	39	p4	(TCTT)3	12	135636	135647	SSC	Exon	ycf1
R. pycnantha	40	p1	(A)12	12	146854	146865	IR	Intergenic spacer	trnV-GAC_rps12

[truncated: 5 more sheets: R. rotundifolia, R. thyrsoidea (1), R. thyrsoidea (2), R. tomentosa, R. xuefengensis]
