# Supplementary material for: Plastome structure, phylogeny and evolution of plastid genes in Reevesia (Helicteroideae, Malvaceae)
Source: Research Square preprint supplement (doi:10.21203/rs.3.rs-3774053/v1), 2023-12-28
Supplement: Supplementary file 7 [file fdfa5d7b13f89c322fc8681f.xlsx]

## Sheet: Sheet
Table S7. Information of species included in phylogenetic analyses
Species	Family	Genome size (bp)	NCBI Accession Number
Vatica odorata (Griff.) Symington	Dipterocarpaceae	151,553 bp	NC_054172.1
Abelmoschus esculentus (L.) Moench	Malvoideae, Malvaceae	163,121 bp	NC_035234.1
Abutilon theophrasti Medik.	Malvoideae, Malvaceae	160,446 bp	NC_053702.1
Bombax ceiba Burm.f.	Bombacoideae, Malvaceae	158,997 bp	NC_037494.1
Ceiba speciosa (A.St.-Hil., A.Juss. & Cambess.) Ravenna	Bombacoideae, Malvaceae	160,360 bp	NC_057077.1
Colona floribunda Craib	Grewioideae, Malvaceae	161,089 bp	NC_054164.1
Corchorus capsularis L.	Grewioideae, Malvaceae	161,088 bp	NC_044467.1
Craigia yunnanensis W.W.Sm. & W.E.Evans	Tilioideae, Malvaceae	163,166 bp	NC_045284.1
Durio zibethinus Moon	Helicteroideae, Malvaceae	163,974 bp	NC_036829.1
Excentrodendron hsienmu (Chun et How) H. T. Chang et R. H. Miau	Dombeyoideae, Malvaceae	161,276 bp	NC_054163.1
Firmiana major (W. W. Smith) Hand.-Mazz.	Sterculioideae, Malvaceae	161,302 bp	NC_037242.1
Firmiana pulcherrima Hsue	Sterculioideae, Malvaceae	159,556 bp	NC_036395.1
Grewia biloba G.Don	Grewioideae, Malvaceae	158,064 bp	NC_058214.1
Heritiera parvifolia Merr.	Sterculioideae, Malvaceae	160,193 bp	NC_038057.1
Hibiscus taiwanensis S.Y.Hu	Malvoideae, Malvaceae	162,800 bp	NC_054167.1
Pachira macrocarpa (Schltdl. & Cham.) Walp.	Bombacoideae, Malvaceae	157,936 bp	NC_057439.1
Pterospermum kingtungense C.Y.Wu ex H.H.Hsue	Dombeyoideae, Malvaceae	162,929 bp	NC_042885.1
Pterospermum truncatolobatum Gagnep.	Dombeyoideae, Malvaceae	163,158 bp	NC_054168.1
Reevesia botingensis Hsue (1)	Helicteroideae, Malvaceae	161,532 bp	OP856555
Reevesia botingensis Hsue (2)	Helicteroideae, Malvaceae	160,128 bp	MN533972.1
Reevesia glaucophylla Hsue	Helicteroideae, Malvaceae	161,945 bp	OP868812
Reevesia lofouensis Chun & Hsue	Helicteroideae, Malvaceae	161,894 bp	OL701984.1
Reevesia longipetiolata Merr. & Chun	Helicteroideae, Malvaceae	161,826 bp	OP868809
Reevesia membranacea Hsue (1)	Helicteroideae, Malvaceae	161,852 bp	OP868813
Reevesia membranacea Hsue (2)	Helicteroideae, Malvaceae	161,853 bp	OP868814
Reevesia orbicularifolia Hsue	Helicteroideae, Malvaceae	161,764 bp	OL701983.1
Reevesia pubescens Mast.	Helicteroideae, Malvaceae	161,784 bp	OL701985.1
Reevesia pycnantha Y. Ling	Helicteroideae, Malvaceae	161,964 bp	MZ929418.1
Reevesia rotundifolia Chun	Helicteroideae, Malvaceae	161,809 bp	MZ242236.1
Reevesia thyrsoidea Lindl. (1)	Helicteroideae, Malvaceae	161,832 bp	OP868810
Reevesia thyrsoidea Lindl. (2)	Helicteroideae, Malvaceae	161,786 bp	NC_041441.1
Reevesia tomentosa Li	Helicteroideae, Malvaceae	161,830 bp	OP868811
Reevesia xuefengensis (C.J. Qi) C.J. Qi	Helicteroideae, Malvaceae	161,859 bp	OL701987.1
Sida szechuensis Matsuda	Malvoideae, Malvaceae	159,878 bp	NC_051877.1
Sterculia lanceolata Cav.	Sterculioideae, Malvaceae	161,118 bp	NC_054170.1
Sterculia monosperma Vent.	Sterculioideae, Malvaceae	160,178 bp	NC_053571.1
Sterculia nobilis Sm.	Sterculioideae, Malvaceae	160,177 bp	NC_063575.1
Theobroma cacao L.	Byttnerioideae, Malvaceae	160,619 bp	NC_014676.2
Tilia amurensis Rupr.	Tilioideae, Malvaceae	162,715 bp	NC_028588.1
